# Supplementary material
Source: PubMed Central journal article supplement (PMC7210056)
Supplement: NIHMS1568772-supplement-3.pdf [file NIHMS1568772-supplement-3.pdf]

**Figure S1. Related to Figure 1.**

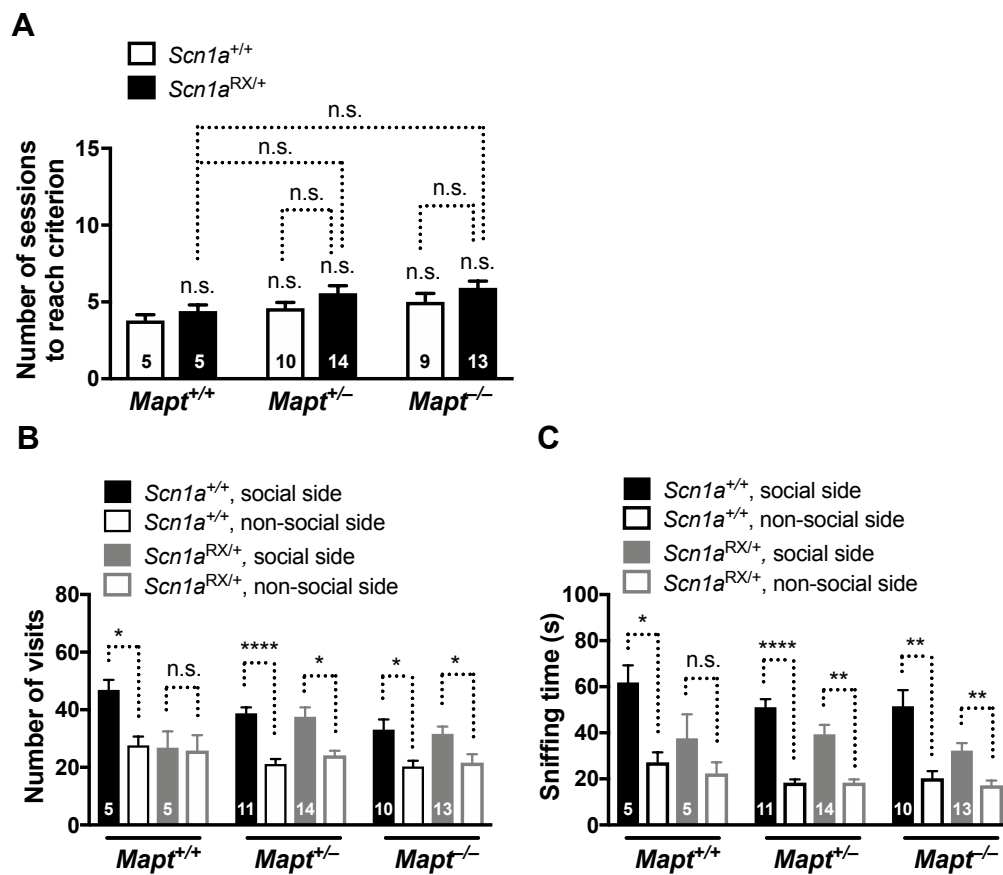

**Figure S1 | Tau Reduction Prevents Autism-like Behaviors in *Scn1a*<sup>RX/+</sup> Mice. Related to Figure 1.**

Male *Scn1a*<sup>+/+</sup> and *Scn1a*<sup>RX/+</sup> mice with the indicated *Mapt* genotypes were assessed for autism-like behaviors at 4–7 months of age. **(A)** Initial learning in water T-maze relearning test. The number of training sessions mice required to learn the initial location of the submerged escape platform was counted. **(B–C)** Three-chamber social interaction test. The number of visits **(B)** and total time mice spent **(C)** interacting with an enclosure containing a live mouse on the “social” side or an empty enclosure in the “nonsocial” side were recorded for 10 minutes. Numbers in bars indicate numbers of mice per genotype. \*\**P* < 0.01, \*\*\**P* < 0.001, \*\*\*\**P* < 0.0001 vs. *Scn1a*<sup>+/+</sup> *Mapt*<sup>+/+</sup> mice or as indicated by brackets, determined by Kruskal-Wallis test with Dunn correction **(A)** or two-tailed paired *t* tests with Holm-Sidak correction **(B, C)**. n.s., not significant. Values are mean ± SEM.

**Figure S2. Related to Figure 1.**

**A**

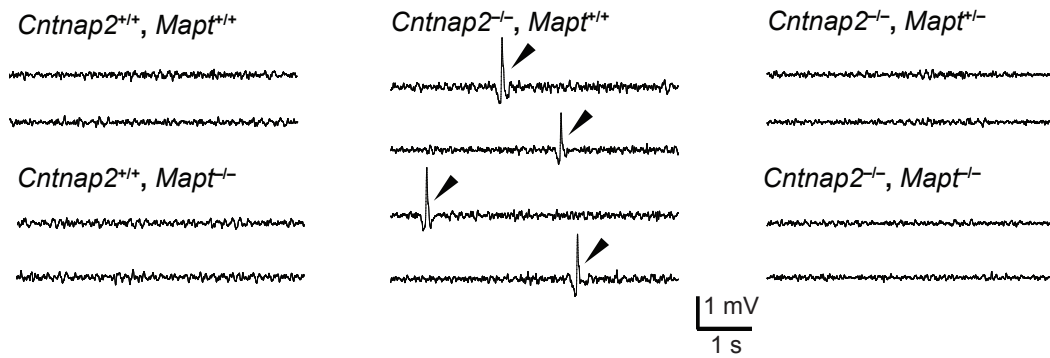

**B**

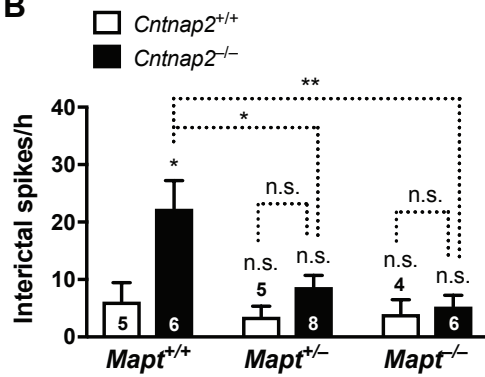

**Figure S2 | Tau Reduction Reduces Epileptic Interictal Spikes in *Cntnap2*<sup>-/-</sup> Mice. Related to Figure 1.**

*Cntnap2*<sup>+/+</sup> and *Cntnap2*<sup>-/-</sup> mice with 2, 1, or 0 *Mapt* alleles were compared at 7–11 months of age. Epileptic interictal spike frequency was determined by subdural EEG recordings in resting mice. **(A)** Representative EEG traces. Note the epileptic spikes (arrowheads) in *Cntnap2*<sup>-/-</sup>*Mapt*<sup>+/+</sup> mice. **(B)** Quantitation of interictal spikes during a 24-hour recording session. Numbers in bars indicate numbers of mice per genotype. \**P* < 0.05, \*\**P* < 0.01 vs. *Cntnap2*<sup>+/+</sup>*Mapt*<sup>+/+</sup> mice or as indicated by brackets, determined by two-way ANOVA with Holm-Sidak test. Interaction between *Scn1a* and *Mapt* genotypes by two-way ANOVA: *P* = 0.063, *F*<sub>2,28</sub> = 3.05. n.s., not significant. Values are mean ± SEM.

Figure S3. Related to Figure 2.

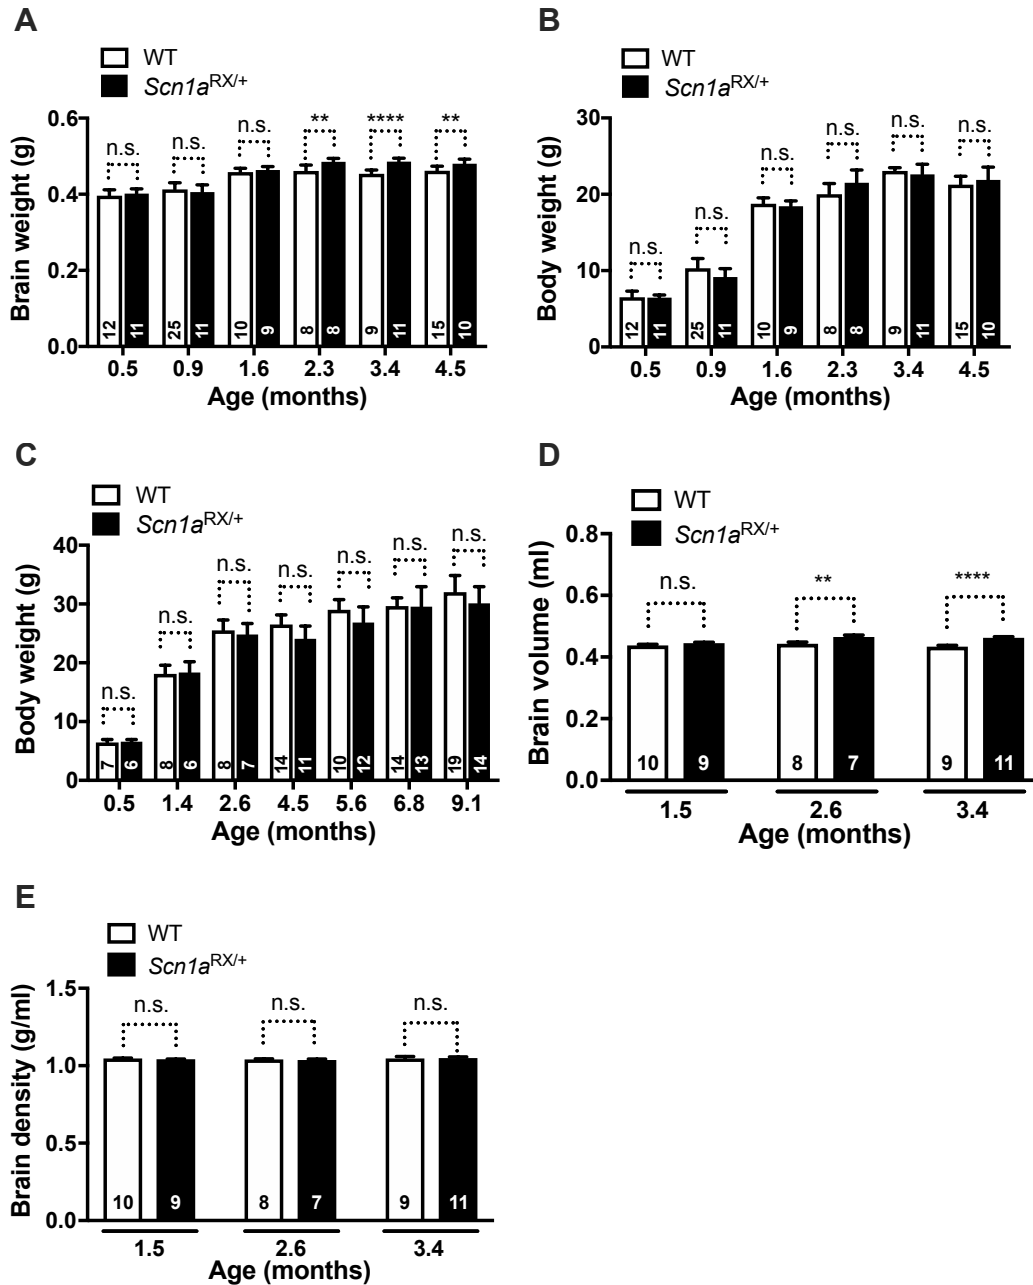

**Figure S3 | *Scn1a*<sup>RX/+</sup> Mice Have Increased Brain Weight and Volume but Normal Brain Density and Body Weight. Related to Figure 2.**

Different groups of *Scn1a*<sup>+/+</sup> (WT) and *Scn1a*<sup>RX/+</sup> mice on the *Mapt*<sup>+/+</sup> background were compared at different ages. **(A, B)** Brain **(A)** and body **(B)** weights of female mice. **(C)** Body weights of the male mice shown in Figure 2A. **(D, E)** Brain volumes **(D)** and densities **(E)** were determined in a subset of female (ages: 1.5 and 3.4 months) and male (age: 2.6 months) mice. \*\* $P < 0.01$ , \*\*\*\* $P < 0.0001$  vs. age-matched WT mice or as indicated by brackets, determined by two-way ANOVA with Holm-Sidak test **(A, D)**, Kruskal-Wallis test with Dunn's test **(E)**, or multiple Welch's  $t$  tests with Holm-Sidak correction **(B, C)**. Interaction between age and brain weight by two-way ANOVA: **(A)**  $P < 0.0001$ ,  $F_{5,127} = 6.52$ ; and between age and brain volume: **(D)**  $P = 0.021$ ,  $F_{2,48} = 4.19$ . n.s., not significant. Values are means  $\pm$  SEM.

Figure S4. Related to Figures 2 and 4.

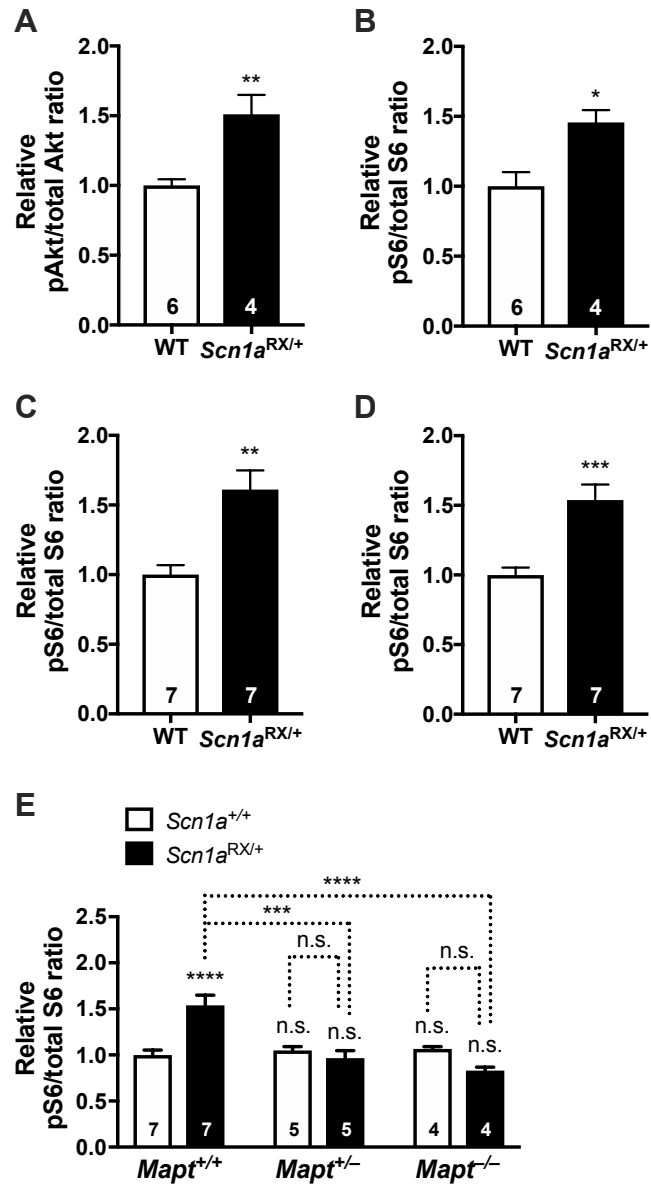

**Figure S4 | Overactivation of PI3K/Akt/mTOR Signaling in *Scn1a*<sup>RX/+</sup> Mice and Prevention by Tau Reduction. Related to Figures 2 and 4.**

(A–B) Relative hippocampal signal ratios for pAkt/total Akt (A) and pS6 (Ser235/236)/total S6 (B) in WT and *Scn1a*<sup>RX/+</sup> mice were determined by western blot analysis at 9–10 months of age. Measurements in these and the other panels of this figure were normalized to the mean ratios in WT mice (defined as 1.0). (C–D) Relative hippocampal signal ratios for pS6 (Ser235/236)/total S6 (C) and pS6 (Ser240/244)/total S6 (D) in WT and *Scn1a*<sup>RX/+</sup> mice were determined by western blot analysis at 2–3 months of age. (E) Relative hippocampal pS6 (Ser240/244)/total S6 ratios were compared in *Scn1a*<sup>+/+</sup> and *Scn1a*<sup>RX/+</sup> mice that had 2, 1, or 0 *Mapt* alleles. Numbers in bars indicate numbers of mice per genotype. \**P* < 0.05, \*\**P* < 0.01, \*\*\**P* < 0.001, \*\*\*\**P* < 0.0001 vs. WT mice or as indicated by brackets, determined by unpaired, two-tailed Student's *t* test (A–D), or two-way ANOVA with Holm-Sidak test (E). Interaction between *Scn1a* and *Mapt* genotypes by two-way ANOVA (E): *P* < 0.0001,  $F_{2,26} = 14.86$ . n.s., not significant. Values are means ± SEM.



Figure S5. Related to Figure 5 and STAR Methods.

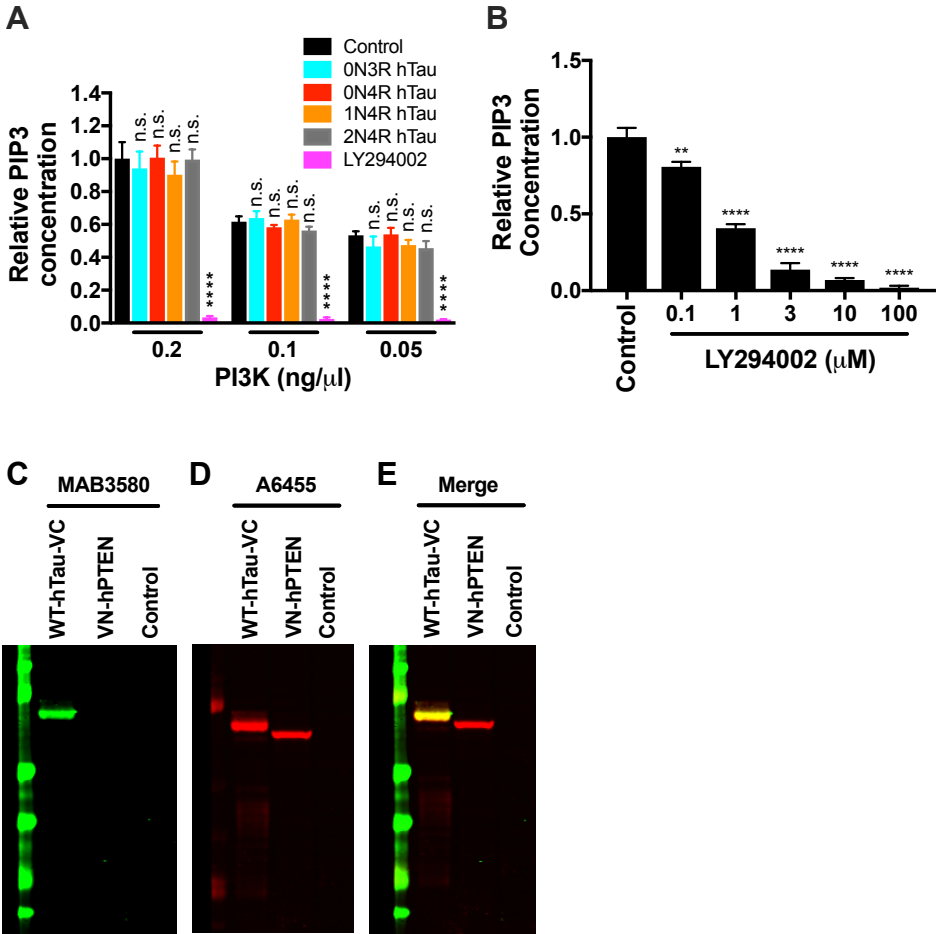

**Figure S5 | Tau Does Not Affect the Lipid Kinase Activity of PI3K; MAB3580 Recognizes VC-tagged but not VN-tagged Proteins. Related to Figure 5 and STAR Methods.**

(A) The lipid kinase activity of PI3K was measured under cell-free conditions in the presence of different recombinant human tau species. Albumin was used as the negative control (Control).  $n = 4$  independent experiments, each including two replicates per condition. LY294002 (10  $\mu\text{M}$ ) was used as a positive control. To combine data from independent experiments, measurements were normalized to the mean PIP3 concentration at 0.2 ng/ $\mu\text{l}$  PI3K with albumin (defined as 1.0). (B) LY294002 inhibits PI3K's lipid kinase activity in a dose-dependent manner.  $n = 3$  independent experiments. PIP3 concentrations in the absence of LY294002 were defined as 1.0. (C–E) Representative western blots of HEK-293 cells that were transfected with hTau-WT-VC or VN-hPTEN or were untransfected (control). Blots were probed with (C) MAB3580, a monoclonal mouse antibody that specifically recognizes VC, or (D) A6455, a rabbit polyclonal antibody that cross-reacts with VC and VN. A merged image is shown in (E).  $**P < 0.01$ ,  $****P < 0.0001$  vs. PI3K concentration-matched control (A) or the left most bar (B), determined by two-way ANOVA with Holm-Sidak test (A) or one-way ANOVA with Holm-Sidak test (B). Interaction between PI3K concentration and tau species by two-way ANOVA (without LY294002 bars): (A)  $P = 0.8635$ ,  $F_{8,45} = 0.48$ . n.s., not significant. Values are means  $\pm$  SEM.

Figure S6. Related to Figure 6.

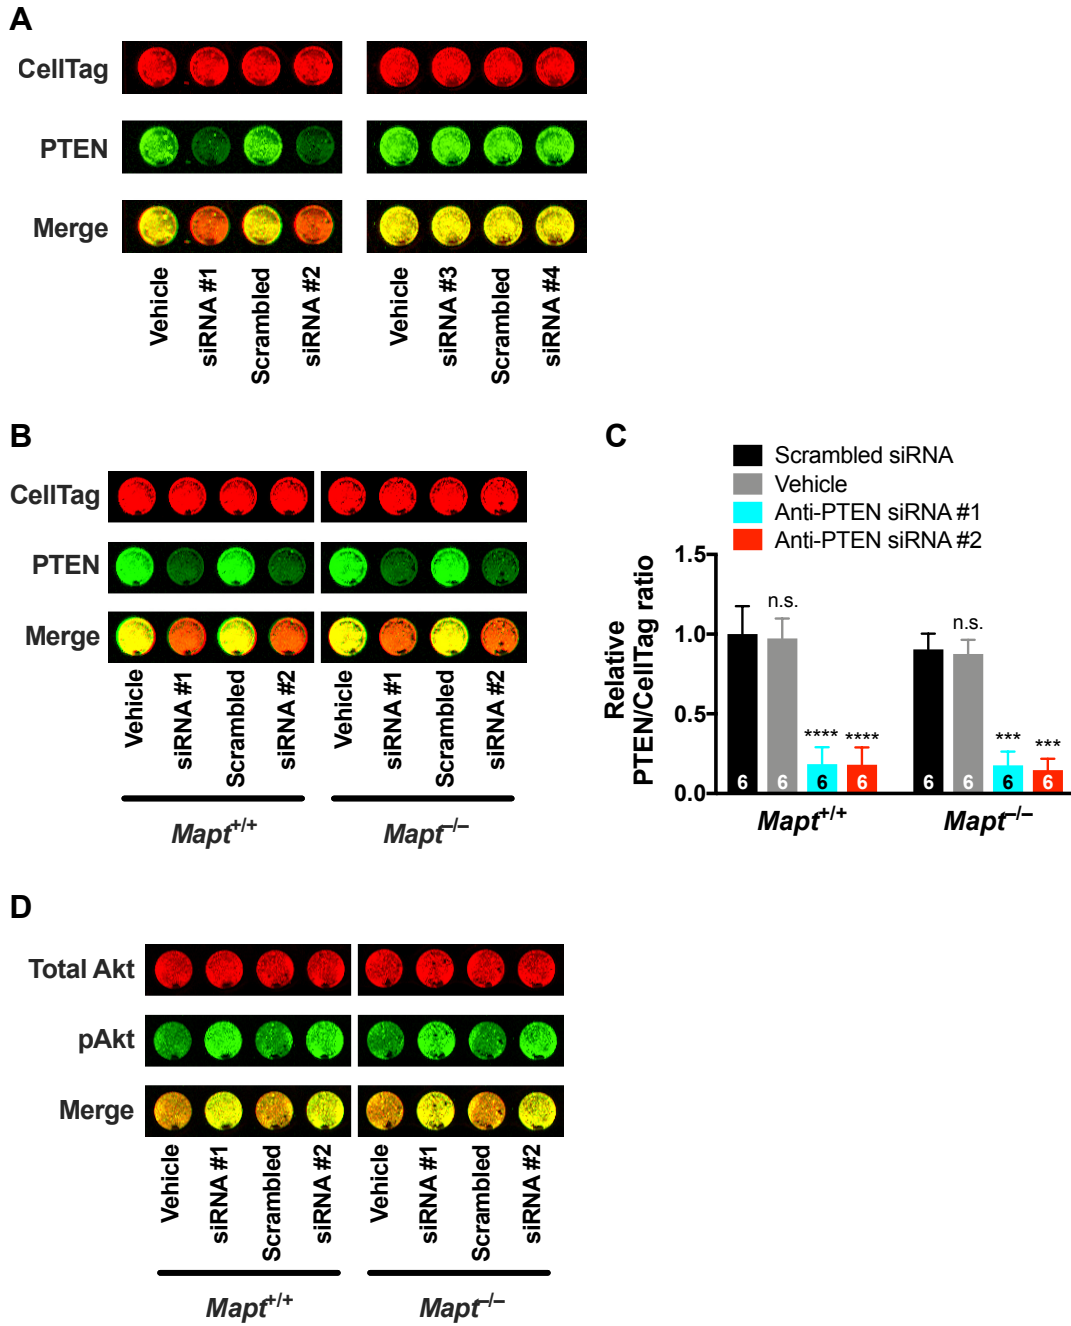

**Figure S6 | Li-COR In-Cell Western Blots Demonstrating Reduced PTEN Protein Levels and Increased PI3K Signaling in *Mapt*<sup>+/+</sup> and *Mapt*<sup>-/-</sup> Neurons Treated with Anti-PTEN siRNAs. Related to Figure 6.**

**(A)** Representative CellTag 700 and PTEN signals in wells of DIV 11 *Mapt*<sup>+/+</sup> mouse neurons after treatment with scrambled siRNA, anti-PTEN siRNAs #1 to #4, or vehicle (1x siRNA buffer, 1:100) on DIV 7. Blots were probed with an antibody against PTEN and with CellTag 700, a reagent used to control for well-to-well variation in cell numbers. For quantitative analyses, see Figure 6A. **(B–C)** CellTag 700 and PTEN signals in DIV 11 *Mapt*<sup>+/+</sup> and *Mapt*<sup>-/-</sup> mouse neurons after treatment with scrambled siRNA, anti-PTEN siRNAs #1 or #2, or vehicle (1x siRNA buffer, 1:100) on DIV 7. Representative In-Cell blots are shown in **(B)** and relative PTEN/CellTag signal ratios in **(C)**. Measurements were normalized to the mean of *Mapt*<sup>+/+</sup> samples treated with scrambled siRNA on the same 96-well plate (defined as 1.0). Numbers in bars indicate biological replicates (independent cultures from individual mouse pups). **(D)** Representative Akt and pAkt signals in DIV 11 *Mapt*<sup>+/+</sup> and *Mapt*<sup>-/-</sup> neurons after treatment with scrambled siRNA, anti-PTEN siRNAs #1 or #2, or vehicle (1x siRNA buffer, 1:100) on DIV 7. For quantitative analyses, see Figure 6B. \*\*\* $P < 0.001$ , \*\*\*\* $P < 0.0001$  vs. the leftmost bar in each genotype, determined by two-way ANOVA and Holm-Sidak test **(C)**. By two-way ANOVA, interaction between genotype and siRNA **(C)**:  $P = 0.97$ ,  $F_{3,40} = 0.08$ . n.s., not significant. Values are means  $\pm$  SEM.

**Figure S7. Related to Figure 7.**

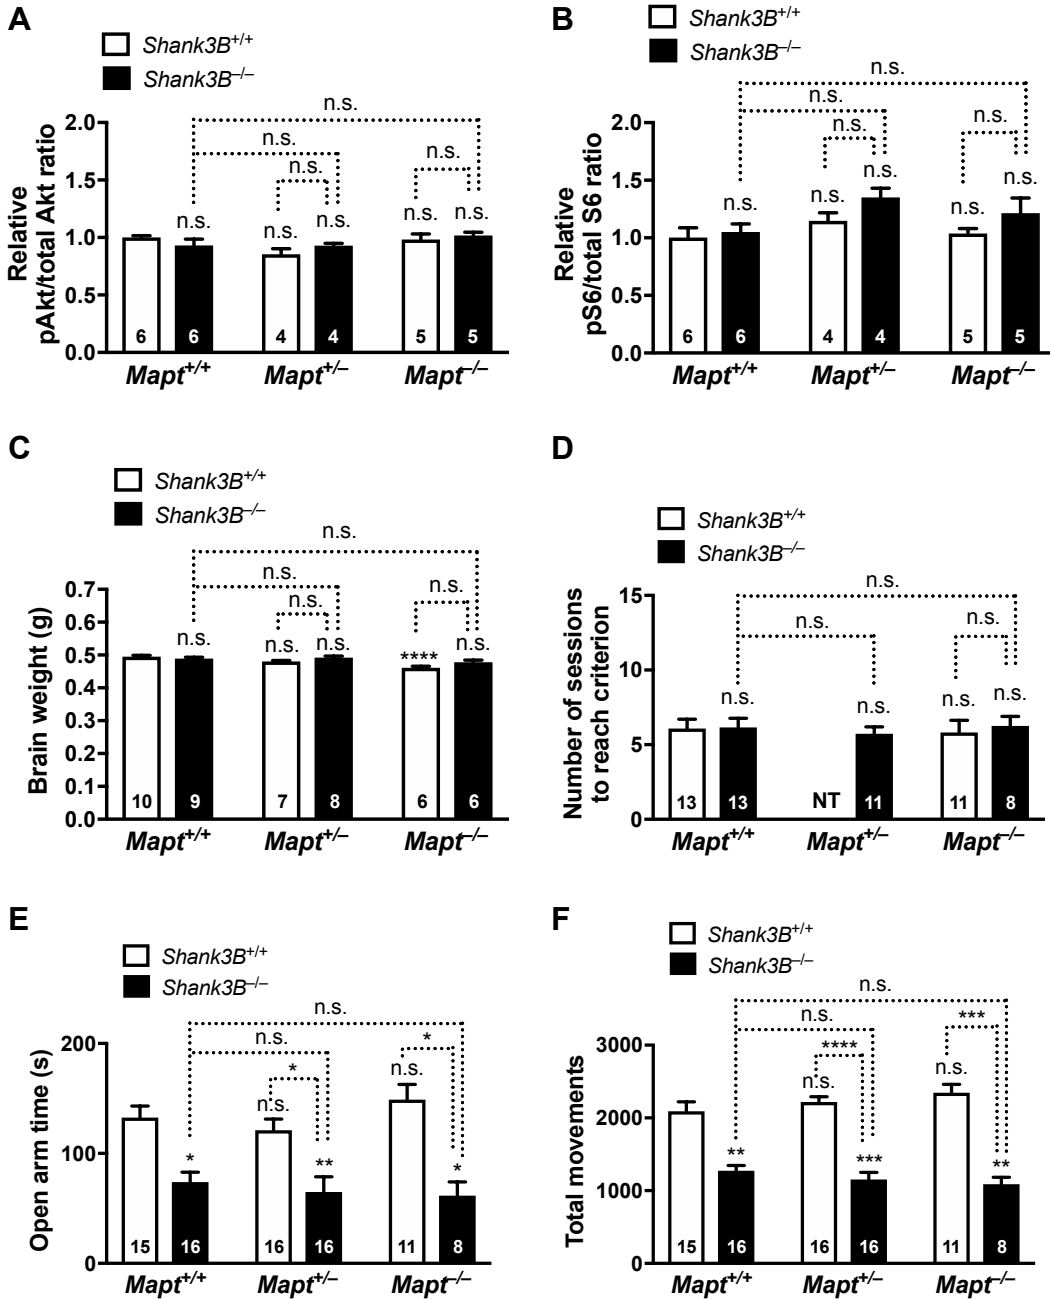

**Figure S7 | Tau Reduction Does Not Affect pAkt and pS6 Activity, Brain Weight or Autism-like Behaviors in *Shank3B*<sup>-/-</sup> Mice. Related to Figure 7.**

(A–C) *Shank3B*<sup>+/+</sup> and *Shank3B*<sup>-/-</sup> mice with 2, 1, or 0 *Mapt* alleles were assessed at 4–6 months of age. (A–B) Relative hippocampal signal ratios for pAkt/total Akt (A) and pS6/total S6 (B) were determined by western blot analysis. Measurements were normalized to the average of *Shank3B*<sup>+/+</sup> *Mapt*<sup>+/+</sup> samples on the same gel (defined as 1.0). (C) Brain weights. (D–F) Male *Shank3B*<sup>+/+</sup> and *Shank3B*<sup>-/-</sup> mice with 2, 1, or 0 *Mapt* alleles were assessed for autism-like behaviors at 8–11 months of age. (D) Initial learning in the water T-maze test. The number of training sessions mice required to learn the initial location of the submerged escape platform was counted. *Shank3B*<sup>+/+</sup> *Mapt*<sup>+/-</sup> mice were not tested (NT) in this paradigm. (E) Elevated plus maze. The time mice spent in the open arms of the maze was recorded for 10 minutes. (F) Open-field test. Total movements were recorded for 15 minutes. Numbers in bars indicate numbers of mice per genotype. \**P* < 0.05, \*\**P* < 0.01, \*\*\**P* < 0.001, \*\*\*\**P* < 0.0001 vs. *Shank3B*<sup>+/+</sup> *Mapt*<sup>+/+</sup> mice, determined by two-way ANOVA with Holm-Sidak test (A, B, C), one-way ANOVA with Holm-Sidak test (D) or Kruskal-Wallis test with Dunn's test (E, F). Interaction between *Shank3B* and *Mapt* genotypes by two-way ANOVA: (A) *P* = 0.19, *F*<sub>2, 24</sub> = 1.77; (B) *P* = 0.62, *F*<sub>2, 24</sub> = 0.48; (C) *P* = 0.028, *F*<sub>2, 40</sub> = 3.94. n.s., not significant. Values are means ± SEM.

**Table S1 | Tau Dependence of Behavioral Abnormalities in *Scn1a*<sup>RX/+</sup>, *Cntnap2*<sup>-/-</sup> and *Shank3B*<sup>-/-</sup> Mice. Related to Figures 1, 2, 7, S1 and S8.**

| ASD Domain                | Behavioral Paradigm                | <i>Scn1a</i> <sup>RX/+</sup> |               | <i>Cntnap2</i> <sup>-/-</sup> |               | <i>Shank3B</i> <sup>-/-</sup> |               |
|---------------------------|------------------------------------|------------------------------|---------------|-------------------------------|---------------|-------------------------------|---------------|
|                           |                                    | Abnormal                     | Tau Dependent | Abnormal                      | Tau Dependent | Abnormal                      | Tau Dependent |
| Repetitive behavior       | Self-grooming                      | Yes                          | Yes           | Yes                           | Yes           | Yes                           | No            |
|                           | Water T-maze                       | Yes                          | Yes           | No*                           | N/A           | Yes                           | No            |
| Communication deficit     | Olfactory exploration              | Yes                          | Yes           | Yes                           | Yes           | Yes                           | No            |
|                           | Ultrasonic vocalizations           | N/T                          | N/T           | Yes                           | Yes           | N/T                           | N/T           |
| Social deficit            | Social preference test             | Yes                          | Yes           | No*                           | N/A           | Yes                           | No            |
|                           | Reciprocal social interaction test | Yes                          | Yes           | No*                           | N/A           | No*                           | N/A           |
| Anxiety and hyperactivity | Elevated plus maze                 | Yes*                         | Yes*          | No*                           | N/A           | Yes                           | No            |
|                           | Open-field test                    | Yes                          | Yes*          | No*                           | N/A           | Yes                           | No            |
| Multiple                  | Nesting                            | Yes*                         | Yes*          | Yes                           | Yes           | No*                           | N/A           |

\*data not shown; N/A, not applicable; N/T, not tested.

**Table S2:** Summary of data and statistical analyses. **Related to STAR Methods.**

| Figure    | Panel | Gaussian distribution | Equal variance | Analysis method          | Multiple comparisons | Biological N |
|-----------|-------|-----------------------|----------------|--------------------------|----------------------|--------------|
| Figure 1  | 1A    | Yes                   | Yes            | Two-way ANOVA            | Holm-Sidak           | 9–14         |
|           | 1B    | Yes                   | Yes            | Two-way ANOVA            | Holm-Sidak           | 5–14         |
|           | 1C    | Yes                   | Yes            | Two-way ANOVA            | Holm-Sidak           | 6–12         |
|           | 1D    | No                    | No             | GEE framework            | Holm-Sidak           | 10–13        |
|           | 1E    | Yes                   | Yes            | Two-way ANOVA            | Holm-Sidak           | 10–13        |
|           | 1F    | Yes                   | Yes            | Two-way ANOVA            | Holm-Sidak           | 6–23         |
|           | 1G    | Yes                   | No             | Multiple Welch's t-tests | Holm-Sidak           | 6–15         |
|           | 1H    | No                    | No             | GEE framework            | Holm-Sidak           | 9–17         |
|           | 1I    | Yes                   | Yes            | Two-way ANOVA            | Holm-Sidak           | 9–17         |
|           | 1J    | Yes                   | Yes            | Two-way ANOVA            | Holm-Sidak           | 12–24        |
| Figure 2  | 2A    | Yes                   | Yes            | Two-way ANOVA            | Holm-Sidak           | 6–19         |
|           | 2B    | Yes                   | Yes            | Two-way ANOVA            | Holm-Sidak           | 7–17         |
|           | 2C    | No                    | Yes            | Kruskal-Wallis test      | Dunn                 | 12–16        |
|           | 2D    | Yes                   | Yes            | Paired t-tests           | Holm-Sidak           | 5–16         |
|           | 2F    | Yes                   | Yes            | Student's t-test         | N/A                  | 5–6          |
|           | 2G    | Yes                   | Yes            | Student's t-test         | N/A                  | 5–6          |
|           | 2I    | Yes                   | Yes            | Two-way ANOVA            | Holm-Sidak           | 4–9          |
|           | 2J    | Yes                   | Yes            | Two-way ANOVA            | Holm-Sidak           | 4–9          |
| Figure 4  | 4A    | Yes                   | Yes            | Two-way ANOVA            | Holm-Sidak           | 15–23        |
|           | 4B    | Yes                   | Yes            | Two-way ANOVA            | Holm-Sidak           | 4–6          |
|           | 4C    | Yes                   | Yes            | Two-way ANOVA            | Holm-Sidak           | 4–6          |
|           | 4D    | Yes                   | Yes            | Two-way ANOVA            | Holm-Sidak           | 5–9          |
|           | 4E    | Yes                   | Yes            | Two-way ANOVA            | Holm-Sidak           | 5–9          |
|           | 4F    | Yes                   | Yes            | Two-way ANOVA            | Holm-Sidak           | 10–12        |
|           | 4G    | Yes                   | Yes            | One-way ANOVA            | Holm-Sidak           | 4–5          |
|           | 4H    | Yes                   | Yes            | One-way ANOVA            | Holm-Sidak           | 4–5          |
| Figure 5  | 5C    | Yes                   | No             | Multiple Welch's t-tests | Holm-Sidak           | 3            |
|           | 5H    | Yes                   | Yes            | One-way ANOVA            | Holm-Sidak           | 3            |
| Figure 6  | 6A    | Yes                   | Yes            | One-way ANOVA            | Holm-Sidak           | 4–7          |
|           | 6B    | Yes                   | Yes            | Two-way ANOVA            | Holm-Sidak           | 9            |
|           | 6C    | Yes                   | Yes            | Two-way ANOVA            | Holm-Sidak           | 9            |
|           | 6D    | Yes                   | Yes            | Two-way ANOVA            | Holm-Sidak           | 9            |
|           | 6E    | Yes                   | Yes            | Two-way ANOVA            | Holm-Sidak           | 9            |
|           | 6F    | Yes                   | Yes            | Two-way ANOVA            | Holm-Sidak           | 9            |
| Figure 7  | 7A    | Yes                   | Yes            | Two-way ANOVA            | Holm-Sidak           | 5–6          |
|           | 7B    | Yes                   | Yes            | Two-way ANOVA            | Holm-Sidak           | 5–6          |
|           | 7C    | No                    | Yes            | Kruskal-Wallis test      | Dunn                 | 7–10         |
|           | 7D    | Yes                   | Yes            | Two-way ANOVA            | Holm-Sidak           | 5–12         |
|           | 7E    | Yes                   | No             | Multiple Welch's t-tests | Holm-Sidak           | 10–20        |
|           | 7F    | Yes                   | Yes            | One-way ANOVA            | Holm-Sidak           | 8–13         |
|           | 7G    | Yes                   | No             | Paired t-tests           | Holm-Sidak           | 8–16         |
|           | 7H    | No                    | No             | GEE framework            | Holm-Sidak           | 8–15         |
|           | 7I    | Yes                   | Yes            | One-way ANOVA            | Holm-Sidak           | 8–15         |
| Figure S1 | S1A   | No                    | Yes            | Kruskal-Wallis test      | Dunn                 | 5–14         |
|           | S1B   | Yes                   | Yes            | Paired t-tests           | Holm-Sidak           | 5–14         |
|           | S1C   | Yes                   | Yes            | Paired t-tests           | Holm-Sidak           | 5–14         |
| Figure S2 | S2    | Yes                   | Yes            | Two-way ANOVA            | Holm-Sidak           | 4–8          |
| Figure S3 | S3A   | Yes                   | Yes            | Two-way ANOVA            | Holm-Sidak           | 8–25         |



|           |     |     |     |                          |            |      |
|-----------|-----|-----|-----|--------------------------|------------|------|
|           | S3B | Yes | No  | Multiple Welch's t-tests | Holm-Sidak | 8–25 |
|           | S3C | Yes | No  | Multiple Welch's t-tests | Holm-Sidak | 6–19 |
|           | S3D | Yes | Yes | Two-way ANOVA            | Holm-Sidak | 7–11 |
|           | S3E | No  | Yes | Kruskal-Wallis test      | Dunn       | 7–11 |
| Figure S4 | S4A | Yes | Yes | Student's t-test         | N/A        | 4–6  |
|           | S4B | Yes | Yes | Student's t-test         | N/A        | 4–6  |
|           | S4C | Yes | Yes | Student's t-test         | N/A        | 7    |
|           | S4D | Yes | Yes | Student's t-test         | N/A        | 7    |
|           | S4E | Yes | Yes | Two-way ANOVA            | Holm-Sidak | 4–7  |
| Figure S5 | S5A | Yes | Yes | Two-way ANOVA            | Holm-Sidak | 4    |
|           | S5B | Yes | Yes | One-way ANOVA            | Holm-Sidak | 3    |
| Figure S6 | S6C | Yes | Yes | Two-way ANOVA            | Holm-Sidak | 6    |
| Figure S7 | S7A | Yes | Yes | Two-way ANOVA            | Holm-Sidak | 4–6  |
|           | S7B | Yes | Yes | Two-way ANOVA            | Holm-Sidak | 4–6  |
|           | S7C | Yes | Yes | Two-way ANOVA            | Holm-Sidak | 6–10 |
|           | S7D | Yes | Yes | One-way ANOVA            | Holm-Sidak | 8–13 |
|           | S7E | No  | Yes | Kruskal-Wallis test      | Dunn       | 8–16 |
|           | S7F | No  | Yes | Kruskal-Wallis test      | Dunn       | 8–16 |

GEE, Generalized Estimating Equations
